1 **A u-shape association of serum uric acid with gout**  
2 **in US adults**

3 Yan Xinmiao<sup>1</sup>, Sun Taolan<sup>1</sup>, Zhao Zixuan<sup>1</sup>, Luo Yanrong<sup>2</sup>, Zhao Hanbing<sup>2</sup>, Zhao Han<sup>2</sup>, Li Miaojing<sup>2\*</sup>

4 <sup>1</sup> Chengdu Medical College, Chengdu, Sichuan, 610500, PR China

5 <sup>2</sup> Department of health management, College of health and intelligent engineering, Chengdu,

6 Sichuan, 610500, PR China

7 \*Corresponding author

8 E-mail: [limiaojing@aliyun.com](mailto:limiaojing@aliyun.com) (LMJ)

9

## 10 **Abstract**

### 11 **Background**

12 Serum uric acid (SUA) level is the strongest determinant of gout, and the  
13 relationship between hyperuricemia and gout has been found. However, the  
14 association between the across-full range of SUA level and gout also  
15 remains uncertain. We aimed to investigate the trend across an across-full  
16 range of SUA level and gout in the general population.

### 17 **Materials and Methods**

18 This study included 4,738 US adults from The National Health and Nutrition  
19 Examination Survey (NHANES). A generalized additive model was used to  
20 fit the non-linear trend between SUA level and gout.

### 21 **Results**

22 2,209 males and 2,469 females were included in our study, with the age  
23 range of 20~80 years. The range of SUA level was from 0.8 to 15.1 mg/dL.  
24 About 5.9% of participants had gout. There was a U-shape association  
25 between SUA level and gout in univariable GAM (EDF = 3.881,  $p < 0.001$ )  
26 and multivariable GAM (EDF = 3.795,  $p < 0.001$ ). The lowest risk of gout  
27 was observed in participants with SUA level of 5-6mg/dL. We evaluated the  
28 trend of SUA level with gout by gender. Both males and females with high  
29 SUA level have a high prevalence of gout. Male have a high prevalence of  
30 gout with low SUA level. The SUA level and prevalence of gout support a  
31 U-shape in males, while females show a linear shape.

## 32 **Conclusion**

33 This study showed that low as well as high SUA are associated with gout.

34 Hypouricemia is a candidate predictor of gout in US adults.

35

36

37

## 38 **Introduction**

39 According to the Global Burden of Disease (GBD) 2017, there were 41.2  
40 million (95% *UI*: 36.7 million~46.1 million) adults with gout worldwide. In  
41 2017, the age standardized point prevalence estimate and the increase of  
42 age-standardized point prevalence estimate of gout in the United States  
43 ranked among the top three in the world[1]. A prospective cohort study  
44 showed that the all-cause standardized mortality in gout patients was 2.21  
45 (95% *CI*: 1.68-2.74)[2]. In addition, gout is associated with several diseases,  
46 including joint pain, chronic kidney disease (CKD), hypertension, type 2  
47 diabetes, dyslipidemia, etc[3], which has effect on the life [4],  
48 productivity[5, 6] and health-related quality of life (HRQOL)[7, 8]. High  
49 uric acid (hyperuricemia) is the strongest determinant of gout, and many  
50 studies have proved the existence of this association [9-11]. SUA level can  
51 be maintained at a certain target level through urate-lowering treatment  
52 (ULT), effectively reducing the incidence of gout[12, 13]. Although some  
53 research on high SUA level and gout has been reported, the underlying  
54 association between across-full range of SUA level and gout is still  
55 uncertain. There is currently a lack of consensus regarding the optimal range  
56 for SUA levels and few studies have evaluated the prevalence of gout across  
57 the full range of SUA level in the US adults.

58 An analysis of the time of first gout occurrences using Cox proportional

59 hazards model in a cohort study in Japan showed that the HR of  
60 asymptomatic hyperuricemia ( $5.0 < \text{SUA} \leq 6.0$  mg/dL) of ULT was the  
61 lowest, at 0.45 (95% *CI*: 0.27-0.76), compared with untreated subjects ( $\text{SUA}$   
62  $\geq 8.0$  mg/dL). In subjects with asymptomatic hyperuricemia, controlling  
63  $\text{SUA}$  can reduce or eliminate gout occurrences[14]. In another Mendelian  
64 randomization study, it presented convincing evidence that the increased  
65 risk of gout was associated with high  $\text{SUA}$  level ( $n=71\ 501$ , *OR*: 5.84; 95%  
66 *CI*: 4.56-7.49,  $p<0.01$ )[15]. Meanwhile, studies have shown that before the  
67 age of 65 years, male have a fourfold greater incidence of gout than female  
68 [10, 16-18]. However, the risk of gout development in patients with  
69 hypouricemia has not yet been clarified. D'silva et al reported that the risk  
70 of all-cause mortality risk among US males with  $\text{SUA}$  level  $<4$  mg/dL was  
71 about 30% higher[19]. This indicates that it is necessary to further study  
72 the relationship between  $\text{SUA}$  level and gout and its impact on males and  
73 females.  
74 Therefore, based on the National Health and Nutrition Examination Survey  
75 (NHANES), we explore the trend between  $\text{SUA}$  level and gout.

76

## 77 **Materials and methods**

78

### 79 **Data Source and Study Population**

80 The National Health and Nutrition Examination Survey (NHANES) is a

81 unique source of national data on the health and nutritional status of the US  
82 population, collecting data through interviews, standard exams, and  
83 biospecimen collection. NHANES adopts a stratified and multi-stage  
84 sampling design, and the survey population involves each county in US.  
85 Each year, about 5,000 persons in 15 counties are selected to conduct a  
86 nationally representative sample survey. Informed consent was obtained  
87 from all participants.

88

89 NHANES 2017-2018 dataset was used in this study. There was a total of  
90 9,254 participants being enrolled. Participants with age  $\geq 20$  years old were  
91 included for analysis. However, we excluded participants that had no uric  
92 acid data ( $n=3353$ ), no gout data ( $n=987$ ), missing in covariates variables  
93 ( $n=176$ ). Eventually, 4,738 participants were included in our study and the  
94 distribution of the number of participants with different value of uric acid  
95 are shown in Fig 1.

96

97 **Fig 1. Distribution of the number of participants with different value of uric**

98 **acid.**

99

## 100 **Variable measurements**

101 Socio-demographic factors and modifiable risk factor of gout were included  
102 in this study. We obtained the data of these variables from seven parts of

103 following: “Demographic Data”, “Standard Biochemistry Profile”,  
104 “Alcohol Use”, “Blood Pressure & Cholesterol”, “Smoking - Cigarette Use”,  
105 “Kidney Conditions - Urology” and “Medical Conditions”.

106

## 107 **Gout**

108 Gout was self-reported data. Whether participants have gout was defined  
109 using the question, “Has a doctor or other health professional ever told you  
110 that you had gout?”.

111

## 112 **Serum Uric acid level**

113 In this study, we used the SUA level in the laboratory data as interested  
114 independent variable and recorded as a continuous variable. The detail  
115 process of laboratory data measurement was described in the NHANES  
116 database official website.

117

## 118 **Covariates**

119 In this study, the covariates included gender, age, education, marriage, race,  
120 alcohol drinking, smoking, hypertension, diabetes and kidney disease. Age  
121 was divided into three groups: 20~39, 40~59, and 60 years or older.  
122 Education level was categorized into primary and secondary, high school,  
123 above high school. Marriage was grouped into four categories: married,  
124 widowed divorced or separated, never married, living with a partner. Race

125 was divided into six categories: Mexican American, other Hispanic, non-  
126 Hispanic White, non-Hispanic Black, non-Hispanic Asian, other race -  
127 including Multi-Racial. Alcohol drinking was classified as never, almost  
128 every day, 3 to 4 times a week, 1 to 2 times a week, 1 to 3 times a month,  
129 and 1 to 11 times a year. Smoking was defined as "at least 100 cigarettes in  
130 a lifetime". Diagnosis of hypertension, diabetes and kidney disease were  
131 determined with questions: "Have you ever been told by a doctor or health  
132 care provider that you have high blood pressure, diabetes or problems with  
133 high blood sugar, weak or failing kidneys".

134

## 135 **Statistical Analysis**

136 Descriptive statistics on participants' characteristics were stratified by  
137 whether they had gout. Chi-squared test was utilized to determine the  
138 association between categorical variable. The generalized additive model  
139 (GAM) was used to assess the potential trend between SUA level and gout.  
140 The GAM approach is an extension of the generalized linear model (GLM),  
141 which is a generalized linear model with linear predictions involving sums  
142 of covariates (Wood, 2011). The smoothness of the model terms was  
143 estimated using penalized cubic regression splines for fitting. The model  
144 selection included the Akaike information criterion (AIC), the difference  
145 between EDF and ref. df, with lower values considered to be better-fitting  
146 models. As our response variable types were categorical variables, we chose



---

147 “Logit” as our link function, and it was considered that the fixed effects  
148 were estimated by Restrictive maximum likelihood (REML).  
149 (<http://doi.org/10.1080/01621459.2016.1180986>)

150 Non-linear relationship of SUA level with gout was assessed through GAM.  
151 In our analysis, we fit three GAM models to NHANES data. The three  
152 models used gout (yes/no) as a binary response.

153

---

|         | Response               | Predictor                      |
|---------|------------------------|--------------------------------|
| Model 1 | Gout                   | Smooth (SUA level)             |
| Model 2 | Gout                   | Smooth (SUA level) +Covariates |
| Model 3 | Gout (Group by Gender) | Smooth (SUA level) +Covariates |

---

154

155 The reported values of effective degree of freedom (EDF) demonstrate the  
156 degree of curvature of the smooth. “EDF=1” means a linear pattern of the  
157 relationship. “EDF >1” is the sign of a more complex relationship between  
158 SUA level and gout. The Ref. df is close to the EDF when the GAM is  
159 reasonably fitted. The best explanation for the P-value of the smooth part  
160 is that a line parallel to the X-axis cannot pass through the 95% confidence  
161 interval of the curve.

162 SAS 9.4 (Statistical analysis system) was used for data cleaning and  
163 statistical description. GAM in our analysis was using the "mgcv" package  
164 (version 1.8–28) in R statistical software (version 4.1.1). The statistical  
165 tests were two-sided, and the significance level was set at 0.05.

166

## 167 Results

### 168 Characteristics of participants

169 A total of 4,738 eligible participants (2,209 males and 2,469 females) were  
 170 included in our study, with the age range of 20~80 years. About 48.12%  
 171 were male, and 56.61% educated in above high school. A total of 50.65%  
 172 of the sample were married. The range of SUA level was from 0.8 to 15.1  
 173 mg/dL. About 5.9% of participants had gout. All factors had significant  
 174 statistical differences except education, details are shown in Table 1.

175 **Table 1. characteristics of the participants in NHANES according to gout**

|                       | <i>n</i> (%) | Gout                |                     | <i>P</i> |
|-----------------------|--------------|---------------------|---------------------|----------|
|                       |              | Yes , <i>n</i> =280 | No , <i>n</i> =4458 |          |
| Uric acid (mg/dL)     |              | 6.35±1.79           | 5.41±1.46           | <0.001   |
| Gender                |              |                     |                     |          |
| Male                  | 2280(48.12)  | 193(8.46)           | 2087(91.54)         | <0.001   |
| Female                | 2458(51.88)  | 87(3.54)            | 2371(96.46)         |          |
| Age                   |              |                     |                     |          |
| 20-39years            | 1444(30.48)  | 13(0.90)            | 1431(99.10)         | <0.001   |
| 40-59years            | 1515(31.98)  | 74(4.88)            | 1441(95.12)         |          |
| Over 60 years         | 1779(37.55)  | 193(10.85)          | 1586(89.15)         |          |
| Education             |              |                     |                     |          |
| Primary and secondary | 389(8.21)    | 20(5.14)            | 369(94.86)          | 0.780    |
| High                  | 1667(35.18)  | 98(5.88)            | 1569(94.12)         |          |
| Above high            | 2682(56.61)  | 162(6.04)           | 2520(93.96)         |          |
| Marital Status        |              |                     |                     |          |
| Married               | 2400(50.65)  | 153(6.38)           | 2247(93.63)         | <0.001   |

|                                     |             |            |             |        |
|-------------------------------------|-------------|------------|-------------|--------|
| Widowed, Divorced or Separated      | 1068(22.54) | 84(7.87)   | 984(92.13)  |        |
| Never married                       | 845(17.83)  | 23(2.72)   | 822(97.28)  |        |
| Living with partner                 | 425(8.97)   | 20(4.71)   | 405(95.29)  |        |
| Race                                |             |            |             |        |
| Mexican American                    | 651(13.74)  | 21(3.23)   | 630(96.77)  | 0.002  |
| Other Hispanic                      | 444(9.37)   | 16(3.60)   | 428(96.40)  |        |
| Non-Hispanic White                  | 1656(34.95) | 116(7.00)  | 1540(93.00) |        |
| Non-Hispanic Black                  | 1080(22.79) | 67(6.20)   | 1013(93.80) |        |
| Non-Hispanic Asian                  | 670(14.14)  | 48(7.16)   | 622(92.84)  |        |
| Other Race - Including Multi-Racial | 237(5.00)   | 12(5.06)   | 225(94.94)  |        |
| Alcohol                             |             |            |             |        |
| Never drink                         | 927(23.20)  | 73(7.87)   | 854(92.13)  | 0.001  |
| Every day or almost every day       | 272(6.81)   | 25(9.19)   | 247(90.81)  |        |
| 3-4 times a week                    | 243(6.08)   | 18(7.41)   | 225(92.59)  |        |
| 1-2 times a week                    | 603(15.09)  | 34(5.64)   | 569(94.36)  |        |
| 1-3 times a month                   | 841(21.05)  | 39(4.64)   | 802(95.36)  |        |
| 1-11 times last year                | 1110(27.78) | 47(4.23)   | 1063(95.77) |        |
| Diabetes                            |             |            |             |        |
| Yes                                 | 737(15.56)  | 100(13.57) | 637(86.43)  | <0.001 |
| No                                  | 3853(81.32) | 166(4.31)  | 3687(95.69) |        |
| Borderline                          | 148(3.12)   | 14(9.46)   | 134(90.54)  |        |
| Kidney disease                      |             |            |             |        |
| Yes                                 | 188(3.97)   | 42(22.34)  | 146(77.66)  | <0.001 |
| No                                  | 4550(96.03) | 238(5.23)  | 4312(94.77) |        |
| Hypertension                        |             |            |             |        |
| Yes                                 | 1790(37.78) | 185(10.34) | 1605(89.66) | <0.001 |
| No                                  | 2948(62.22) | 95(3.22)   | 2853(96.78) |        |

---

| Smoking |             |           |             |        |
|---------|-------------|-----------|-------------|--------|
| Yes     | 1967(41.52) | 160(8.13) | 1807(91.87) | <0.001 |
| No      | 2771(58.48) | 120(4.33) | 2651(95.67) |        |

---

176

177 **Model 1: Gout and serum uric acid(univariable)**

178 Model 1 used gout (Yes/No) as a binary response. The results of non-linear  
 179 parameters of GAM were presented in Table 2. A smoothing spline function  
 180 of SUA level as a univariable predictor was shown in Fig 2( $EDF= 3.881$ ,  
 181  $p<0.001$ ). The prevalence of gout increased with the increase of SUA level  
 182 at the SUA level of 5-10 mg/dL. When the SUA level was extreme, the trend  
 183 was relatively flat.

184

185 **Fig 2. Figure of estimated smoothing spline function of prevalence of gout (The**  
 186 **reference group is participants without gout) with 95% confidence band for the**  
 187 **univariable generalized additive model 1.**

188

189 **Table 2. the smooth function of gout measured by the GAM (model1)**

| Smooth terms    | EDF   | Ref.df | $c^2$ | $P$    |
|-----------------|-------|--------|-------|--------|
| Reference (Yes) |       |        |       |        |
| Gout (No)       | 3.881 | 4.875  | 123.4 | <0.001 |

190

191 **Model 2: Gout and serum uric acid(multivariable)**

192 Model 2, which was a multivariable version of model 1 but further adjusted  
 193 for covariates was shown in Fig 3. A non-linear shape was found between

194 SUA level and gout ( $EDF=3.795$ ,  $p<0.001$ ), and the predicted smooth  
195 association of SUA level and gout including the 95% confidence intervals,  
196 was shown in Fig 3. The figure showed a U-shape association of SUA level  
197 and the prevalence of gout in multivariable GAM models. The lowest  
198 prevalence observed was SUA level of 5-6mg/dL. SUA level had the  
199 strongest effect on gout at the SUA level which was lower than 5 mg/dL or  
200 at 6-11 mg/dL. While SUA level exceed 11 mg/dL, the prevalence of gout  
201 began to decline slowly. The results of non-linear parameters of GAM were  
202 presented in Table 3, the parameter section results were detailed in S1 Table.

203

204 **Fig 3. Figure of estimated smoothing spline function of prevalence of gout (The**  
205 **reference group is participants without gout) with 95% confidence band for the**  
206 **multivariable generalized additive model 2 adjusted for gender, age, marital**  
207 **status, education, race, smoking, alcohol, diabetes, kidney disease and**  
208 **hypertension.**

209

210 **Table 3. the smooth function of gout measured by the GAM (model2)**

| Smooth terms    | EDF   | Ref.df | $c^2$ | $P$    |
|-----------------|-------|--------|-------|--------|
| Reference (Yes) |       |        |       |        |
| Gout (No)       | 3.795 | 4.789  | 37.67 | <0.001 |

211

212 **Model 3: Gout and serum uric acid (Group by gender)**

213 Furthermore, the effect of SUA level on gout in male and female was  
 214 evaluated in model 3. The significant result indicates a non-linear shape  
 215 between SUA level and gout in male ( $EDF=1.873$ ,  $p<0.001$ ), which was  
 216 similar to the trend of entire population. However, the non-linear shape  
 217 between SUA level and gout was not identified in female ( $EDF=1.001$ ,  
 218  $p=0.087$ ). The Fig 4 showed the smoothing shapes are different in male and  
 219 female, which a significant U-shape association of SUA level and the gout  
 220 in male and a linear in female. The lowest risk is observed in those SUA  
 221 level 5~6mg/dL in male and low or high SUA level will increase the risk of  
 222 gout. The results of non-linear parameters of GAM were presented in Table  
 223 4, the parameter section results were detailed in S2.1 and S2.2 Table.

224

225 **Fig 4. Figures of estimated smoothing spline function of prevalence of gout level**  
 226 **(Group by gender, and the reference group is participants without gout) with**  
 227 **95% confidence band for the multivariable generalized additive model 3. And a**  
 228 **for male, b for female.**

229

230 **Table 4. Association of SUA level and gout measured by the GAM(Group**  
 231 **by gender)(model3)**

| Smooth terms               | EDF   | Ref.df | $c^2$ | $P$    |
|----------------------------|-------|--------|-------|--------|
| Reference (Yes)            |       |        |       |        |
| Spline (Uric Acid): Male   | 1.873 | 1.984  | 16.45 | <0.001 |
| Spline (Uric Acid): Female | 1.001 | 1.002  | 2.931 | 0.087  |

232

233

## 234 **Discussion**

235 As the final product of purine metabolism, SUA has many effects on the  
236 human body. Previous studies found that increased SUA levels were  
237 associated with gout, diabetes[20], hypertension[21], obesity[22], and  
238 cancer[23, 24]. However, few studies have assessed the relationship  
239 between across-full range of SUA level and gout. This study constructs a  
240 generalized additivity model to explore the potential relationship between  
241 SUA level and gout based on US adults.

242 In our study, the *EDF* of univariate and multivariate models adjusted for  
243 age, sex, education and other important confounding factors were all greater  
244 than 3, indicating a non-linear relationship between SUA level and gout and  
245 a U-shape association was demonstrated in the figure. The results of our  
246 study showed a high prevalence of gout with high SUA level in US adults,  
247 but the prevalence of gout begins to decline slowly when SUA level is above  
248 11 mg/dL. Males with low SUA level also have a high prevalence of gout.  
249 The association between SUA level and prevalence of gout support a U-  
250 shape in males, while females show a linear shape.

251 A previous study already confirmed that SUA level higher than 6mg/dL can  
252 increase the risk of gout, which is in agreement with our result[25].

253 Secondly, the prevalence of gout decreased when SUA level was higher than  
254 11 mg/dL. We speculated that the high level of SUA in this part of the

255 population may be caused by other diseases or drugs[26]. Furthermore, low  
256 SUA level was also associated with gout. A sudden decrease in SUA may  
257 also trigger a gout attack by dissolution of monosodium urate (MSU) from  
258 tophi[26]. In addition, hypouricemia has been shown to increase the risk of  
259 worsening kidney function. In the CARES trial, all-cause and  
260 cardiovascular mortality rates were higher in the febuxostat group than in  
261 the allopurinol group, despite lower SUA levels in gout patients taking  
262 febuxostat[27]. Some previous studies also showed that SUA was u-shape  
263 associated with all-cause mortality[28, 29] and nephropathy, and SUA  
264 reduction treatment was associated with higher mortality[30].One study  
265 showed that SUA level between 5-6mg/dL is reasonable[31], which is  
266 consistent with our finding. Ames et al hypothesized that SUA may act as a  
267 protective factor against aging and cancer caused by oxidants and free  
268 radicals due to its antioxidant function[32]. Therefore, SUA should be  
269 maintained in a certain range, above or below this range will increase the  
270 probability of developing gout. The different trends between males and  
271 females are because estrogen has a urination effect on females, which can  
272 reduce the risk of gout. However, with elevated SUA level after menopause,  
273 the proportion of older female with gout may increase and gender  
274 differences decrease[17, 33].

275 Studies have shown that the occurrence of gout is related to kidney  
276 disease[9, 34, 35]. SUA level in vivo is closely related to renal function.



277 About two-thirds of uric acid is excreted in urine[36], and uric acid is  
278 filtered by glomerulus and reabsorbed by proximal tubules, with a normal  
279 excretion rate of 10%[37]. A prospective cohort study showed a U-shape  
280 association between SUA and loss of renal function in healthy subjects[38].  
281 Therefore, the relationship between SUA and kidney disease may be a  
282 potential cause for the existence of this U-shape association that was found  
283 in our study, but further studies are needed to prove this. Because gout is  
284 considered a disease that primarily affects male, it may be underrecognized  
285 in female even after menopause. There were clear differences in risk  
286 between male and female.

287 There are also limitations in our research. Firstly, our research is an  
288 observational study, which cannot infer a causal relationship between SUA  
289 level and gout. Secondly, many variables in our study are self-reported.  
290 Despite these limitations, our study also has advantages. Firstly, this study  
291 used a smoothing curve to explore the non-linear trend between SUA level  
292 and gout. Secondly, we assessed the risk of gout at all SUA level in the  
293 ordinary population, taking into account both low SUA level and high SUA  
294 level. Finally, we assessed the trend of prevalence of gout with SUA level  
295 in both males and females.

296

## 297 **Conclusion**

298 In our study, there is a U-shape between SUA level and gout. High SUA  
299 level or low SUA level are both risk factors for gout. Further researches are  
300 needed to trace people with low SUA level and clarify the  
301 pathophysiological mechanisms between low SUA level and gout to reduce  
302 the likelihood of gout occurring.

303

### 304 **Author Contributions**

305 YXM and STL were responsible for data extraction, data analyses, model  
306 construction and the manuscript writing. LMJ selected the topic, directs the  
307 writing, improves the revision. ZZX provided specific knowledge, carried  
308 out the literature research. ZHB, ZH, LYR coordinated and managed the  
309 operation of the project and the implementation of the project. All authors  
310 read and approved the final manuscript.

311

312

313

## 314 **References**

- 315 1. Safiri S, Kolahi A-A, Cross M, Carson-Chahhoud K, Hoy D, Almasi-Hashiani A, et al.  
316 Prevalence, Incidence, and Years Lived With Disability Due to Gout and Its Attributable Risk Factors  
317 for 195 Countries and Territories 1990-2017: A Systematic Analysis of the Global Burden of Disease  
318 Study 2017. *Arthritis Rheumatol.* 2020;72(11):1916-27. doi: 10.1002/art.41404. PubMed PMID:  
319 32755051.
- 320 2. Disveld IJM, Zoakman S, Jansen TLTA, Rongen GA, Kienhorst LBE, Janssens HJEM, et al.  
321 Crystal-proven gout patients have an increased mortality due to cardiovascular diseases, cancer, and  
322 infectious diseases especially when having tophi and/or high serum uric acid levels: a prospective cohort  
323 study. *Clin Rheumatol.* 2019;38(5):1385-91. doi: 10.1007/s10067-019-04520-6. PubMed PMID:  
324 30929152.
- 325 3. Bardin T, Richette P. Impact of comorbidities on gout and hyperuricaemia: an update on  
326 prevalence and treatment options. *BMC Med.* 2017;15(1):123. doi: 10.1186/s12916-017-0890-9.  
327 PubMed PMID: 28669352.
- 328 4. Roddy E, Zhang W, Doherty M. Is gout associated with reduced quality of life? A case-control  
329 study. *Rheumatology (Oxford).* 2007;46(9):1441-4. PubMed PMID: 17586863.
- 330 5. Edwards NL, Sundry JS, Forsythe A, Blume S, Pan F, Becker MA. Work productivity loss due  
331 to flares in patients with chronic gout refractory to conventional therapy. *J Med Econ.* 2011;14(1):10-5.  
332 doi: 10.3111/13696998.2010.540874. PubMed PMID: 21138339.
- 333 6. Kleinman NL, Brook RA, Patel PA, Melkonian AK, Brizee TJ, Smeeding JE, et al. The impact  
334 of gout on work absence and productivity. *Value Health.* 2007;10(4):231-7. PubMed PMID: 17645677.
- 335 7. Khanna D, Ahmed M, Yontz D, Ginsburg SS, Park GS, Leonard A, et al. The disutility of  
336 chronic gout. *Qual Life Res.* 2008;17(5):815-22. doi: 10.1007/s11136-008-9355-0. PubMed PMID:  
337 18500578.
- 338 8. Singh JA. Racial and gender disparities among patients with gout. *Curr Rheumatol Rep.*  
339 2013;15(2):307. doi: 10.1007/s11926-012-0307-x. PubMed PMID: 23315156.
- 340 9. Kuo C-F, Grainge MJ, Zhang W, Doherty M. Global epidemiology of gout: prevalence,  
341 incidence and risk factors. *Nat Rev Rheumatol.* 2015;11(11):649-62. doi: 10.1038/nrrheum.2015.91.  
342 PubMed PMID: 26150127.
- 343 10. Richette P, Bardin T. Gout. *Lancet.* 2010;375(9711):318-28. doi: 10.1016/S0140-  
344 6736(09)60883-7. PubMed PMID: 19692116.
- 345 11. Dalbeth N, Gosling AL, Gaffo A, Abhishek A. Gout. *Lancet.* 2021;397(10287):1843-55. doi:  
346 10.1016/S0140-6736(21)00569-9. PubMed PMID: 33798500.
- 347 12. Hainer BL, Matheson E, Wilkes RT. Diagnosis, treatment, and prevention of gout. *Am Fam*  
348 *Physician.* 2014;90(12):831-6. PubMed PMID: 25591183.
- 349 13. Perez-Ruiz F. Treating to target: a strategy to cure gout. *Rheumatology (Oxford).* 2009;48  
350 Suppl 2. doi: 10.1093/rheumatology/kep087. PubMed PMID: 19447780.
- 351 14. Koto R, Nakajima A, Horiuchi H, Yamanaka H. Serum uric acid control for prevention of gout  
352 flare in patients with asymptomatic hyperuricaemia: a retrospective cohort study of health insurance  
353 claims and medical check-up data in Japan. *Ann Rheum Dis.* 2021;80(11):1483-90. doi:  
354 10.1136/annrheumdis-2021-220439. PubMed PMID: 34158371.
- 355 15. Keenan T, Zhao W, Rasheed A, Ho WK, Malik R, Felix JF, et al. Causal Assessment of Serum

- 
- 356 Urate Levels in Cardiometabolic Diseases Through a Mendelian Randomization Study. *J Am Coll*  
357 *Cardiol.* 2016;67(4):407-16. doi: 10.1016/j.jacc.2015.10.086. PubMed PMID: 26821629.
- 358 16. Ruoff G, Edwards NL. Overview of Serum Uric Acid Treatment Targets in Gout: Why Less  
359 Than 6 mg/dL? *Postgrad Med.* 2016;128(7):706-15. doi: 10.1080/00325481.2016.1221732. PubMed  
360 PMID: 27558643.
- 361 17. Saag KG, Choi H. Epidemiology, risk factors, and lifestyle modifications for gout. *Arthritis*  
362 *Res Ther.* 2006;8 Suppl 1:S2. PubMed PMID: 16820041.
- 363 18. Wallace KL, Riedel AA, Joseph-Ridge N, Wortmann R. Increasing prevalence of gout and  
364 hyperuricemia over 10 years among older adults in a managed care population. *J Rheumatol.*  
365 2004;31(8):1582-7. PubMed PMID: 15290739.
- 366 19. D'Silva KM, Yokose C, Lu N, McCormick N, Lee H, Zhang Y, et al. Hypouricemia and  
367 Mortality Risk in the US General Population. *Arthritis Care Res (Hoboken).* 2021;73(8):1171-9. doi:  
368 10.1002/acr.24476. PubMed PMID: 33026684.
- 369 20. van der Schaft N, Brahimaj A, Wen K-X, Franco OH, Dehghan A. The association between  
370 serum uric acid and the incidence of prediabetes and type 2 diabetes mellitus: The Rotterdam Study.  
371 *PLoS One.* 2017;12(6):e0179482. doi: 10.1371/journal.pone.0179482. PubMed PMID: 28632742.
- 372 21. Zheng R, Yang T, Chen Q, Chen C, Mao Y. Serum Uric Acid Concentrations Can Predict  
373 Hypertension: A Longitudinal Population-Based Epidemiological Study. *Horm Metab Res.*  
374 2017;49(11):873-9. doi: 10.1055/s-0043-119129. PubMed PMID: 28922678.
- 375 22. Zheng R, Chen C, Yang T, Chen Q, Lu R, Mao Y. Serum Uric Acid Levels and the Risk of  
376 Obesity: a Longitudinal Population-Based Epidemiological Study. *Clin Lab.* 2017;63(10):1581-7. doi:  
377 10.7754/Clin.Lab.2017.170311. PubMed PMID: 29035437.
- 378 23. Yue C-F, Feng P-N, Yao Z-R, Yu X-G, Lin W-B, Qian Y-M, et al. High serum uric acid  
379 concentration predicts poor survival in patients with breast cancer. *Clin Chim Acta.* 2017;473:160-5. doi:  
380 10.1016/j.cca.2017.08.027. PubMed PMID: 28844462.
- 381 24. Shin H-S, Lee H-R, Lee D-C, Shim J-Y, Cho K-H, Suh S-Y. Uric acid as a prognostic factor  
382 for survival time: a prospective cohort study of terminally ill cancer patients. *J Pain Symptom Manage.*  
383 2006;31(6):493-501. PubMed PMID: 16793489.
- 384 25. Perez-Ruiz F, Dalbeth N, Bardin T. A review of uric acid, crystal deposition disease, and gout.  
385 *Adv Ther.* 2015;32(1):31-41. doi: 10.1007/s12325-014-0175-z. PubMed PMID: 25533440.
- 386 26. Zhang W-Z. Why Does Hyperuricemia Not Necessarily Induce Gout? *Biomolecules.*  
387 2021;11(2). doi: 10.3390/biom11020280. PubMed PMID: 33672821.
- 388 27. White WB, Saag KG, Becker MA, Borer JS, Gorelick PB, Whelton A, et al. Cardiovascular  
389 Safety of Febuxostat or Allopurinol in Patients with Gout. *N Engl J Med.* 2018;378(13):1200-10. doi:  
390 10.1056/NEJMoa1710895. PubMed PMID: 29527974.
- 391 28. Hu L, Hu G, Xu BP, Zhu L, Zhou W, Wang T, et al. U-Shaped Association of Serum Uric  
392 Acid With All-Cause and Cause-Specific Mortality in US Adults: A Cohort Study. *J Clin Endocrinol*  
393 *Metab.* 2020;105(1). doi: 10.1210/clinem/dgz068. PubMed PMID: 31650159.
- 394 29. Stotz M, Szkandera J, Seidel J, Stojakovic T, Samonigg H, Reitz D, et al. Evaluation of uric  
395 acid as a prognostic blood-based marker in a large cohort of pancreatic cancer patients. *PLoS One.*  
396 2014;9(8):e104730. doi: 10.1371/journal.pone.0104730. PubMed PMID: 25133546.
- 397 30. Odden MC, Amadu A-R, Smit E, Lo L, Peralta CA. Uric acid levels, kidney function, and  
398 cardiovascular mortality in US adults: National Health and Nutrition Examination Survey (NHANES)  
399 1988-1994 and 1999-2002. *Am J Kidney Dis.* 2014;64(4):550-7. doi: 10.1053/j.ajkd.2014.04.024.

- 
- 400 PubMed PMID: 24906981.
- 401 31. Bellomo G, Selvi A. Uric Acid: The Lower the Better? *Contrib Nephrol.* 2018;192:69-76. doi:  
402 10.1159/000484280. PubMed PMID: 29393097.
- 403 32. Ames BN, Cathcart R, Schwiers E, Hochstein P. Uric acid provides an antioxidant defense in  
404 humans against oxidant- and radical-caused aging and cancer: a hypothesis. *Proc Natl Acad Sci U S A.*  
405 1981;78(11):6858-62. PubMed PMID: 6947260.
- 406 33. Doherty M. New insights into the epidemiology of gout. *Rheumatology (Oxford).* 2009;48  
407 Suppl 2:ii2-ii8. doi: 10.1093/rheumatology/kep086. PubMed PMID: 19447779.
- 408 34. Feig DI, Kang D-H, Johnson RJ. Uric acid and cardiovascular risk. *N Engl J Med.*  
409 2008;359(17):1811-21. doi: 10.1056/NEJMra0800885. PubMed PMID: 18946066.
- 410 35. Dehlin M, Jacobsson L, Roddy E. Global epidemiology of gout: prevalence, incidence,  
411 treatment patterns and risk factors. *Nat Rev Rheumatol.* 2020;16(7):380-90. doi: 10.1038/s41584-020-  
412 0441-1. PubMed PMID: 32541923.
- 413 36. Bobulescu IA, Moe OW. Renal transport of uric acid: evolving concepts and uncertainties.  
414 *Adv Chronic Kidney Dis.* 2012;19(6):358-71. doi: 10.1053/j.ackd.2012.07.009. PubMed PMID:  
415 23089270.
- 416 37. Fathallah-Shaykh SA, Cramer MT. Uric acid and the kidney. *Pediatr Nephrol.* 2014;29(6).  
417 doi: 10.1007/s00467-013-2549-x. PubMed PMID: 23824181.
- 418 38. Kanda E, Muneyuki T, Kanno Y, Suwa K, Nakajima K. Uric acid level has a U-shaped  
419 association with loss of kidney function in healthy people: a prospective cohort study. *PLoS One.*  
420 2015;10(2):e0118031. doi: 10.1371/journal.pone.0118031. PubMed PMID: 25658588.
- 421
- 422

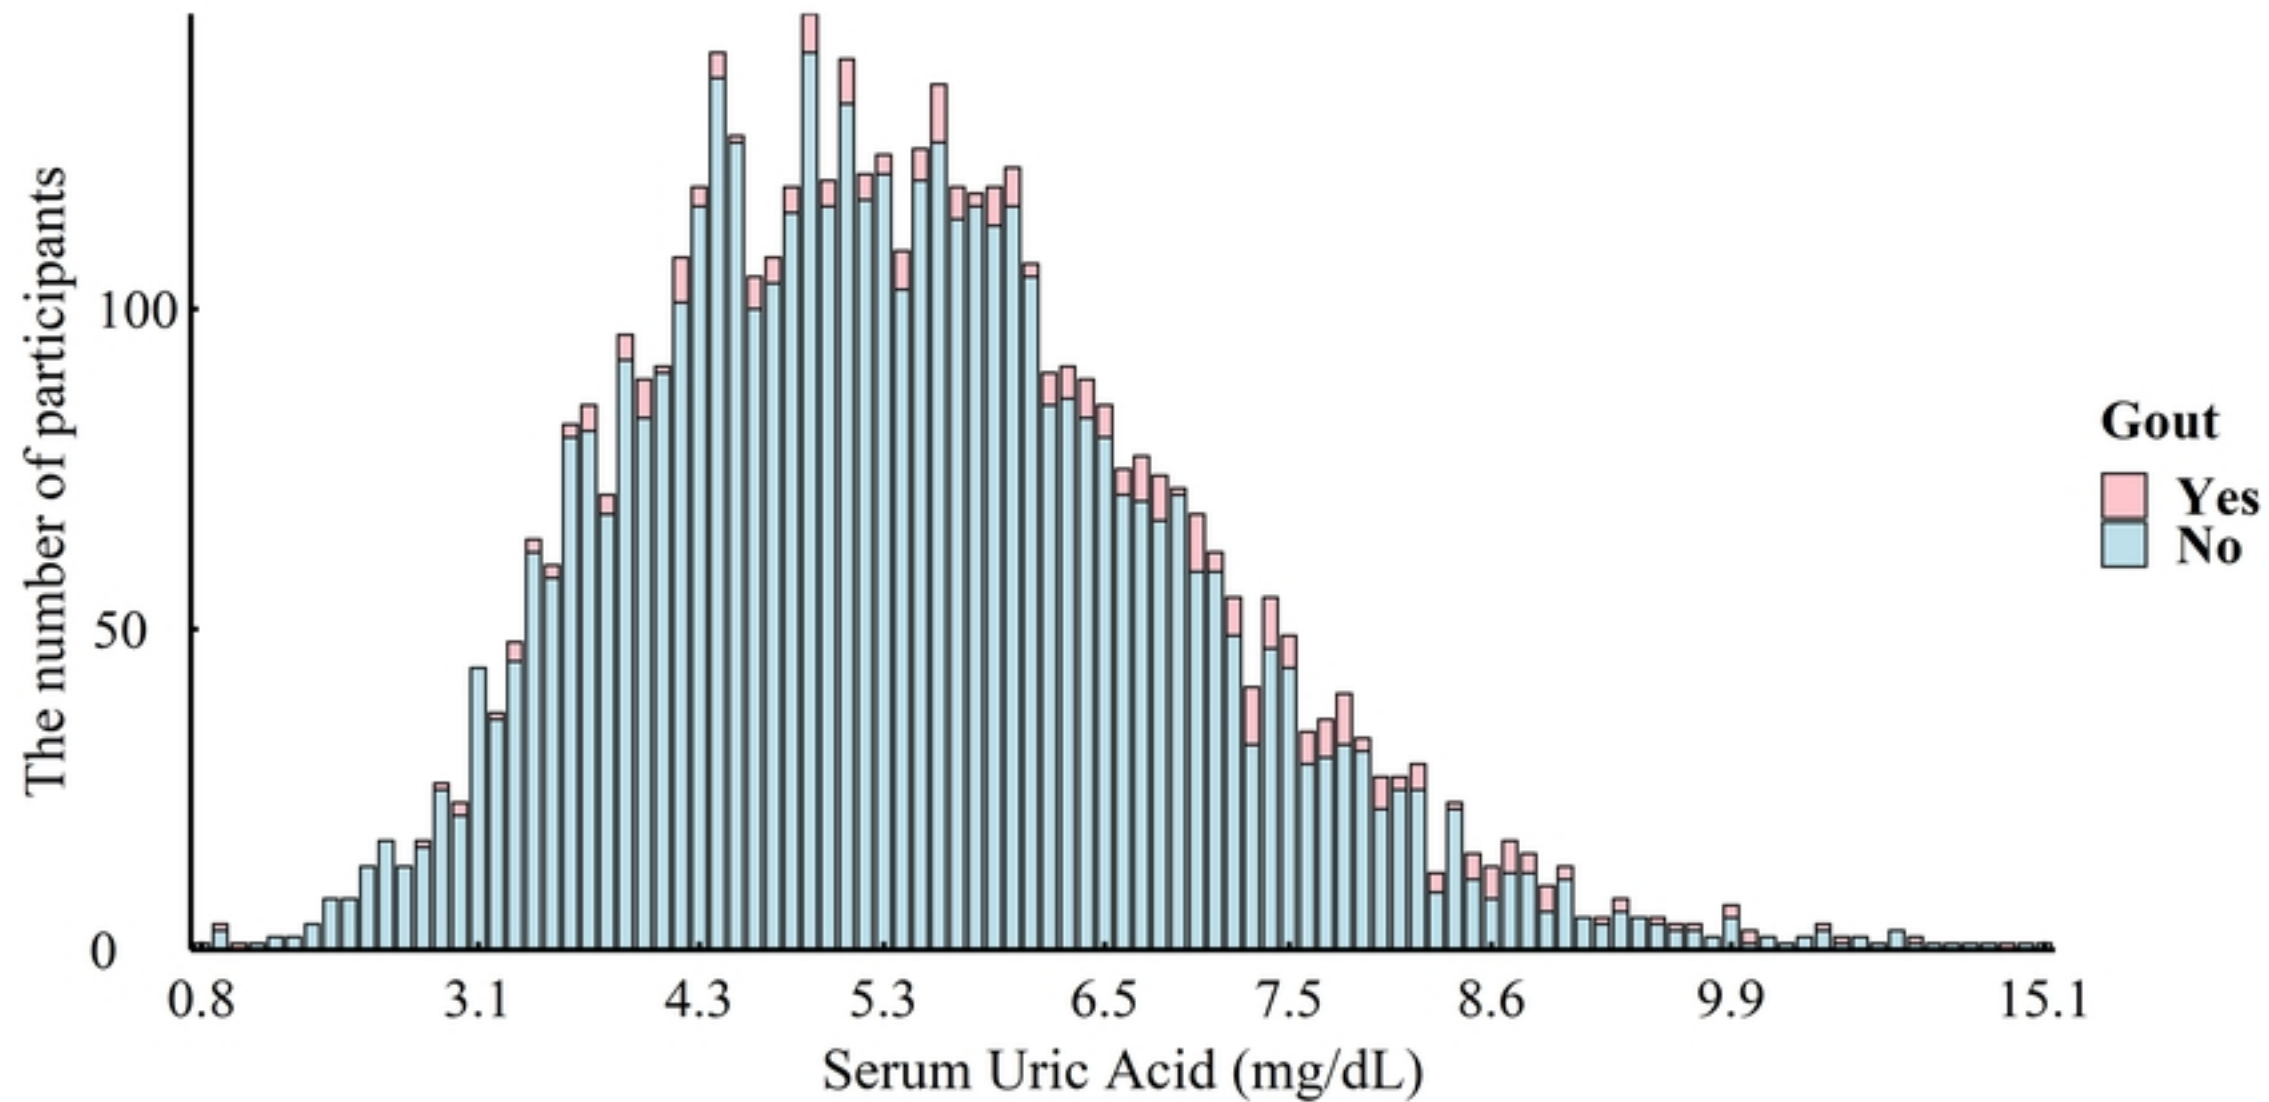

Figure

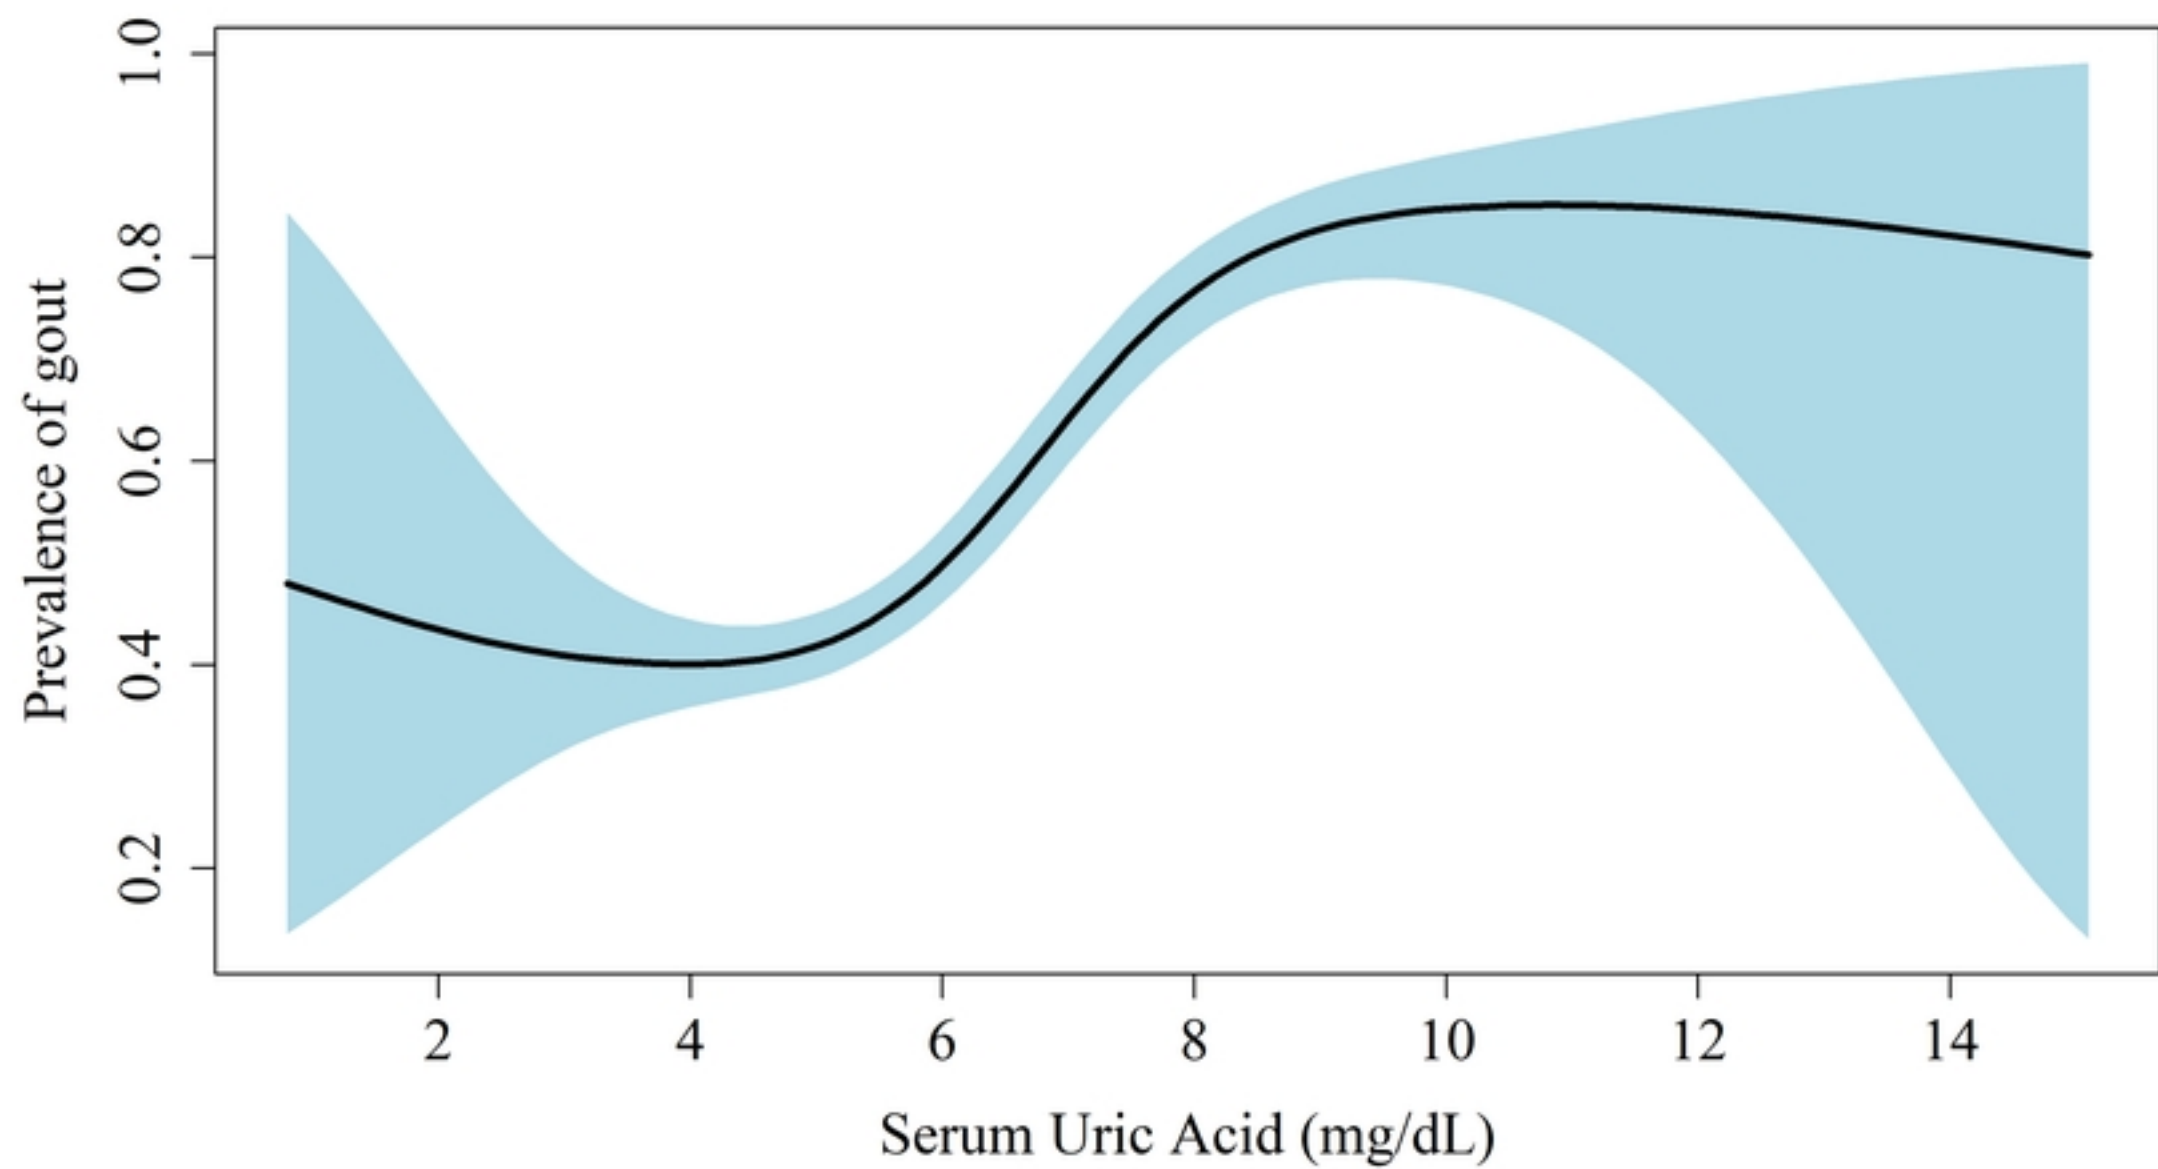

Figure

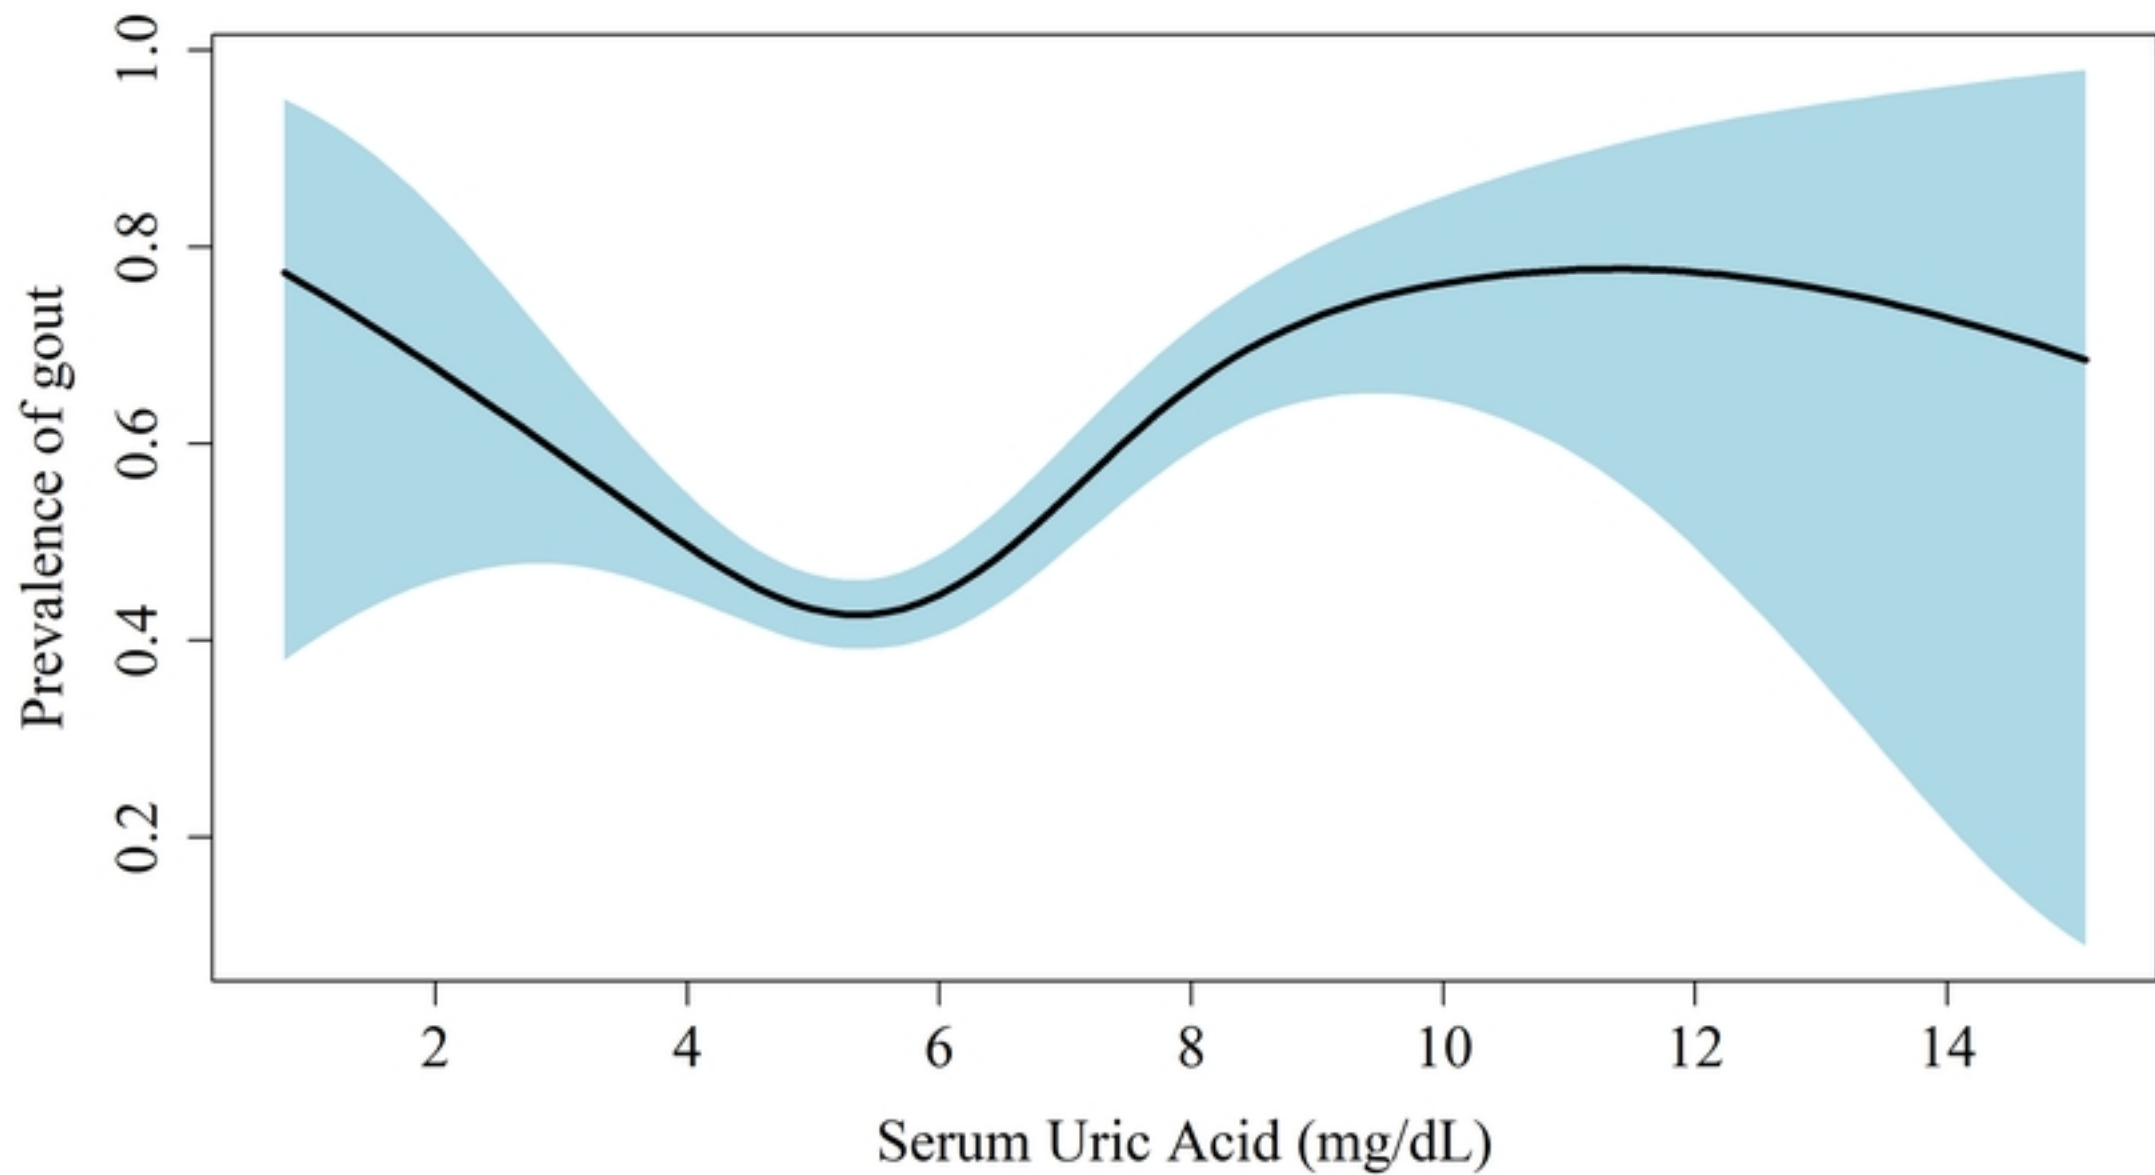

Figure



a.

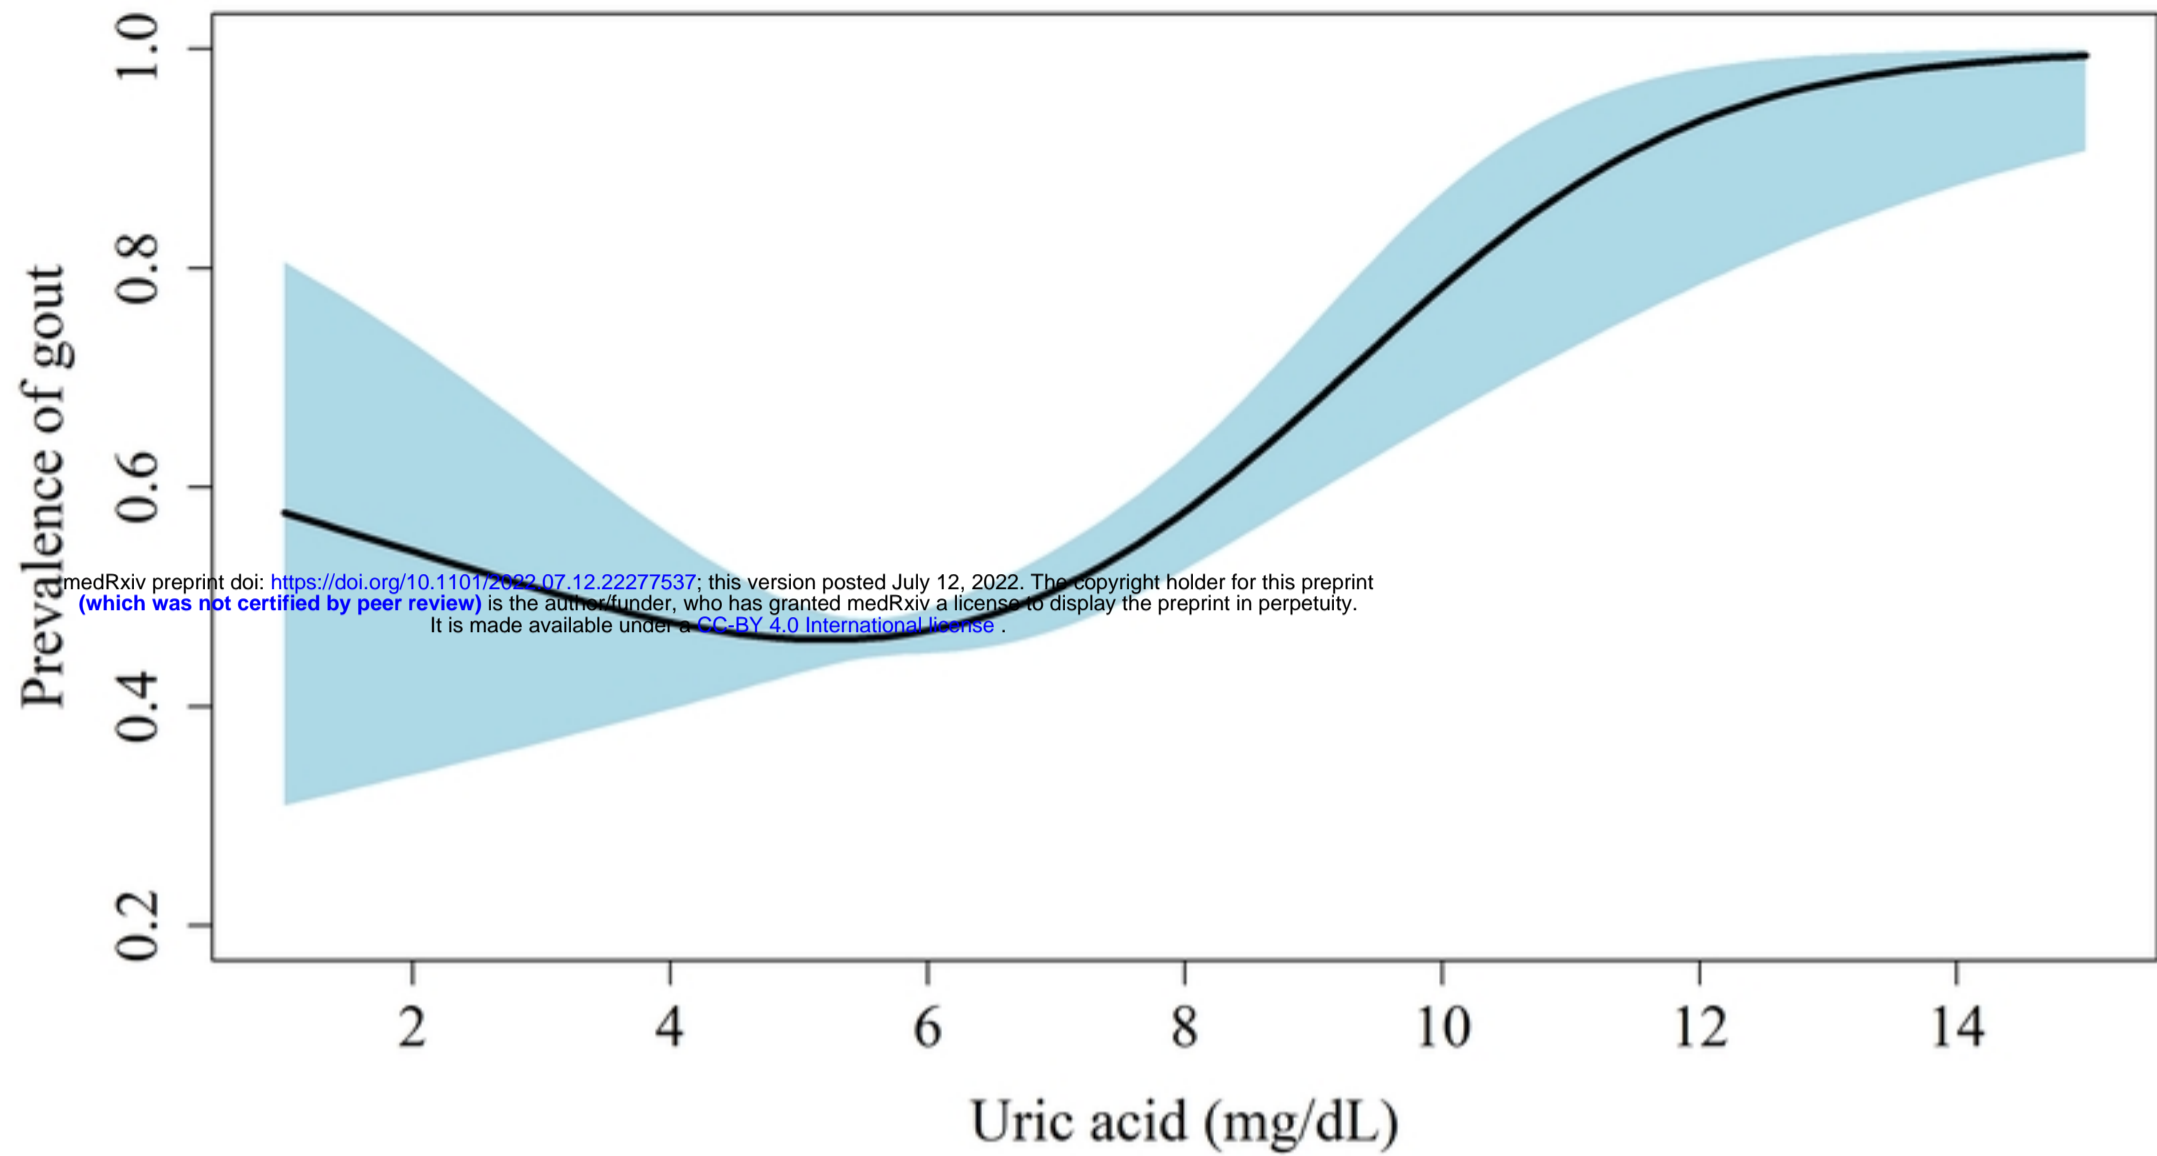

b.

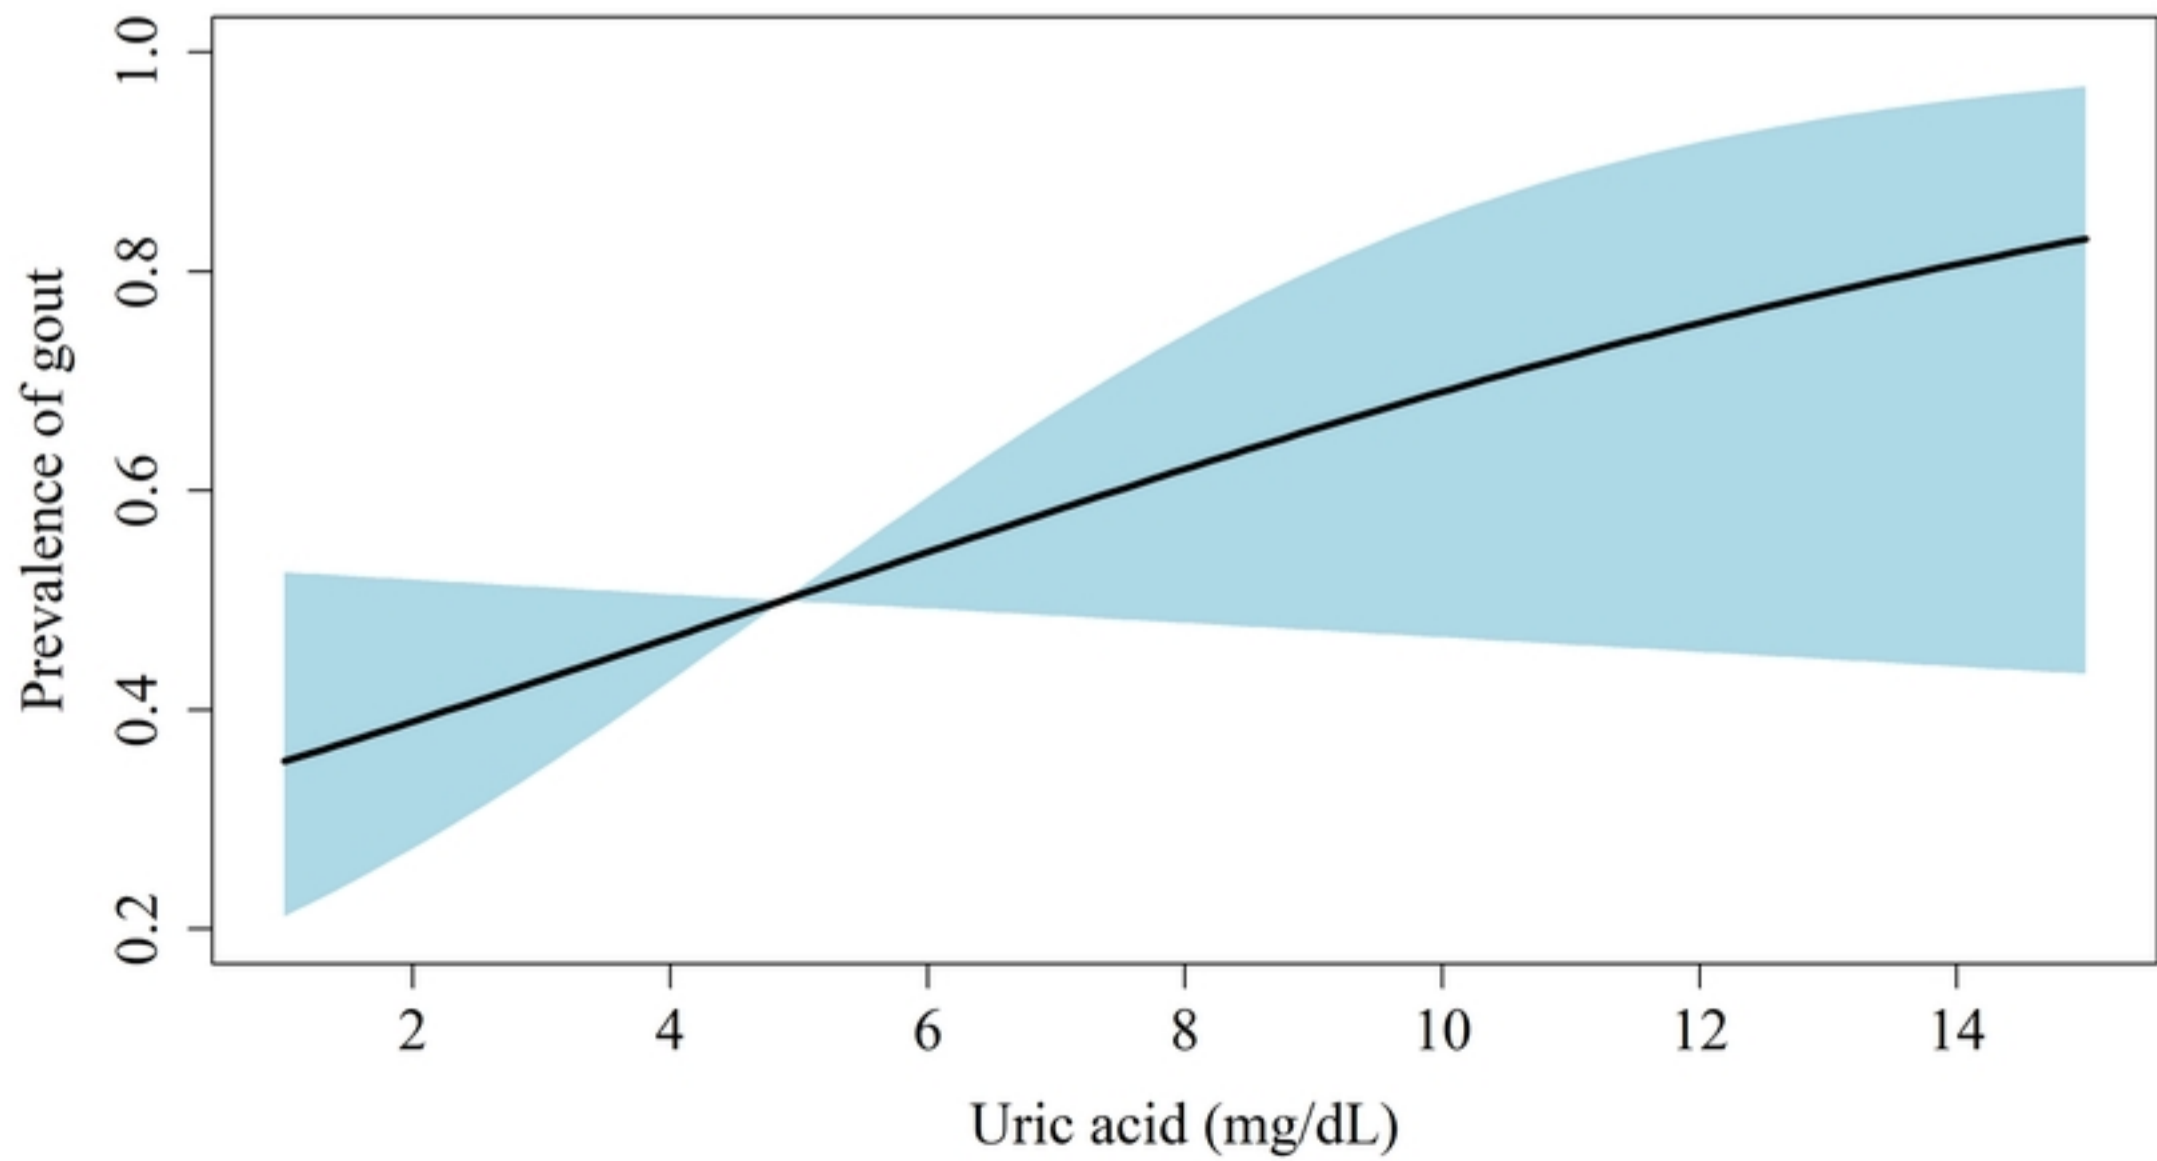

Figure
